# Supplementary material for: Can Forel–Ule Index Act as a Proxy of Water Quality in Temperate Waters? Application of Plume Mapping in Liverpool Bay, UK
Source: MDPI journal article supplement (doi:10.3390/rs14102375), 2022-05-14
Supplement: s1 [file s1]

## Supplementary Material

**Table S1.** Description of the input data layers (\*denotes data were acquired through a data request to the relevant organization).

| Data Name       | Description                                                                                                                                                                                              | Source                                                                                                                                                                                                                                                                                                                                                         |
|-----------------|----------------------------------------------------------------------------------------------------------------------------------------------------------------------------------------------------------|----------------------------------------------------------------------------------------------------------------------------------------------------------------------------------------------------------------------------------------------------------------------------------------------------------------------------------------------------------------|
| Sentinel 3 A, B | Optical satellite                                                                                                                                                                                        | <a href="https://codarep.eumetsat.int/Authentication-EUMETSAT-EO-Portal-User-Registration">https://codarep.eumetsat.int/Authentication - EUMETSAT - EO Portal User Registration</a><br>Data up until 1 year old:<br><a href="https://coda.eumetsat.int">https://coda.eumetsat.int</a><br>For the description of the source please visit <a href="#">here</a> . |
| Nutrients       | Water quality data collected under national monitoring programmes; inorganic nutrients (nitrite, nitrite+nitrate, silicate, phosphate, ammonium), suspended particulate matter, salinity and chlorophyll | Environment Agency ( <a href="#">Open WIMS data</a> ),<br>Natural Resources Wales* ( <a href="https://naturalresources.wales/?lang=en">https://naturalresources.wales/?lang=en</a> ),<br>Cefas* ( <a href="https://data.cefas.co.uk/">https://data.cefas.co.uk/</a> ),<br>Agri-Food & Biosciences Institute (Afbi)*                                            |
| River flow      | Gauged daily flow data (m <sup>3</sup> /s).                                                                                                                                                              | National River Flow Archive (NRFA;<br><a href="http://nrfa.ceh.ac.uk/data/search">http://nrfa.ceh.ac.uk/data/search</a> )                                                                                                                                                                                                                                      |

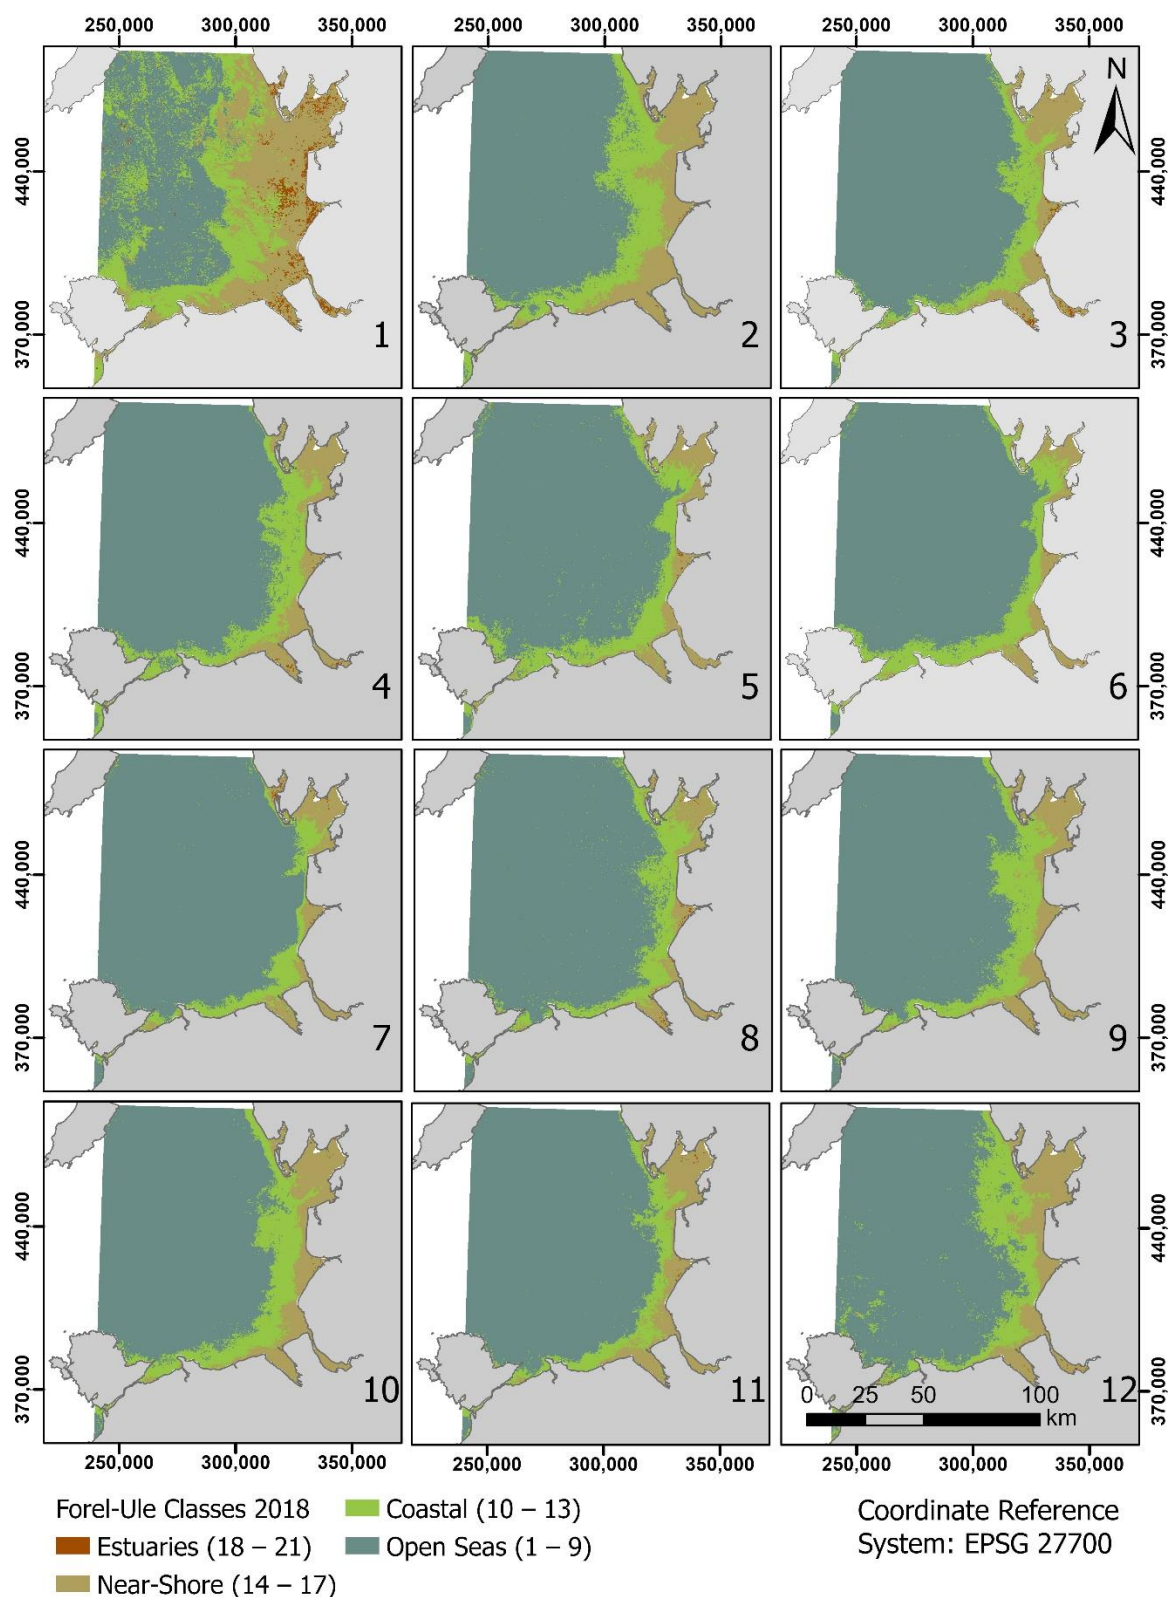

**Figure S1.** Spatial changes observed in the river plume extent (FUI > 10) in 2018 suggest the presence of three seasons: 1. Wet season (months: 12, 1, 2, 3); 2. Dry season (months: 5, 6, 7, 8) and 3. Mixed season (months: 4, 9, 10, 11).

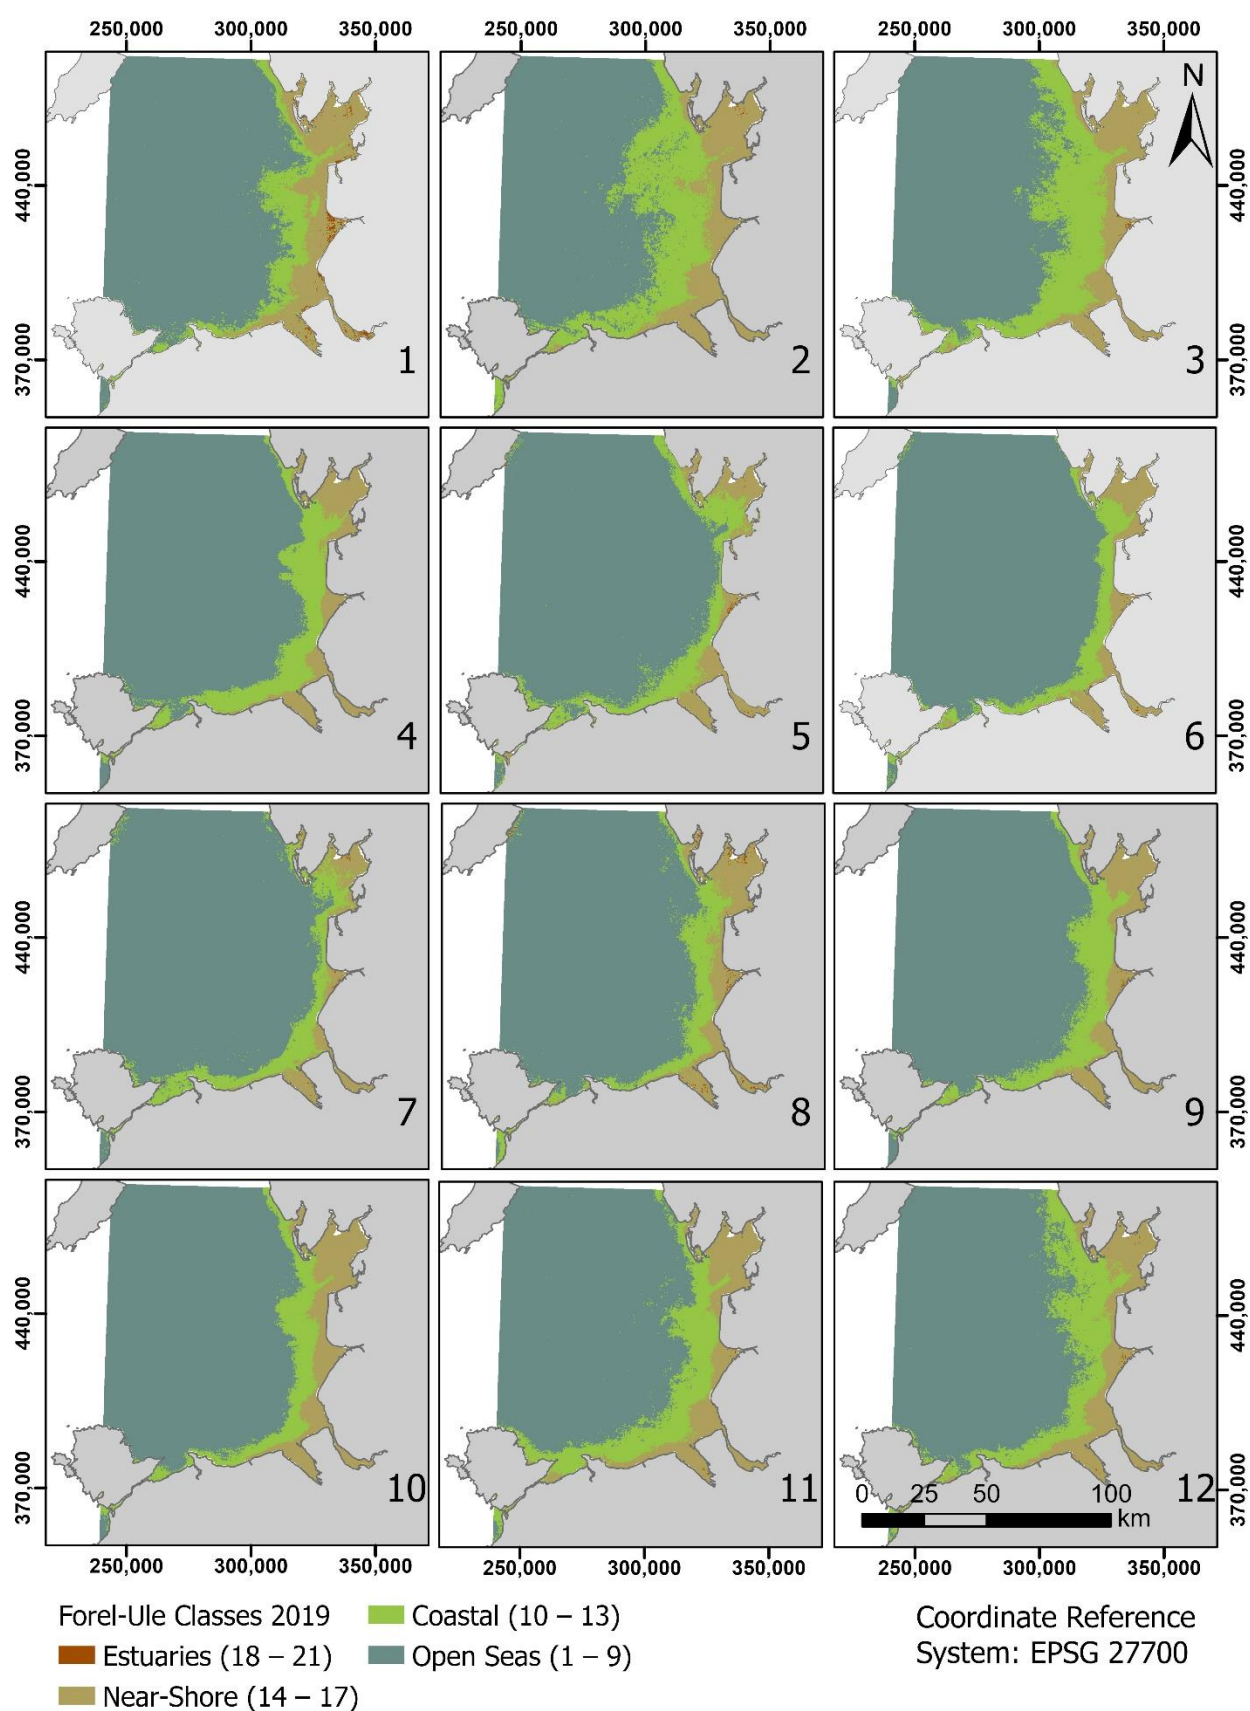

**Figure S2.** Spatial changes observed in the river plume extent ( $FUI \geq 10$ ) in 2020 suggest the presence of three seasons: 1. Wet season (months: 12, 1, 2, 3); 2. Dry season (months: 5, 6, 7, 8) and 3. Mixed season (months: 4, 9, 10, 11).

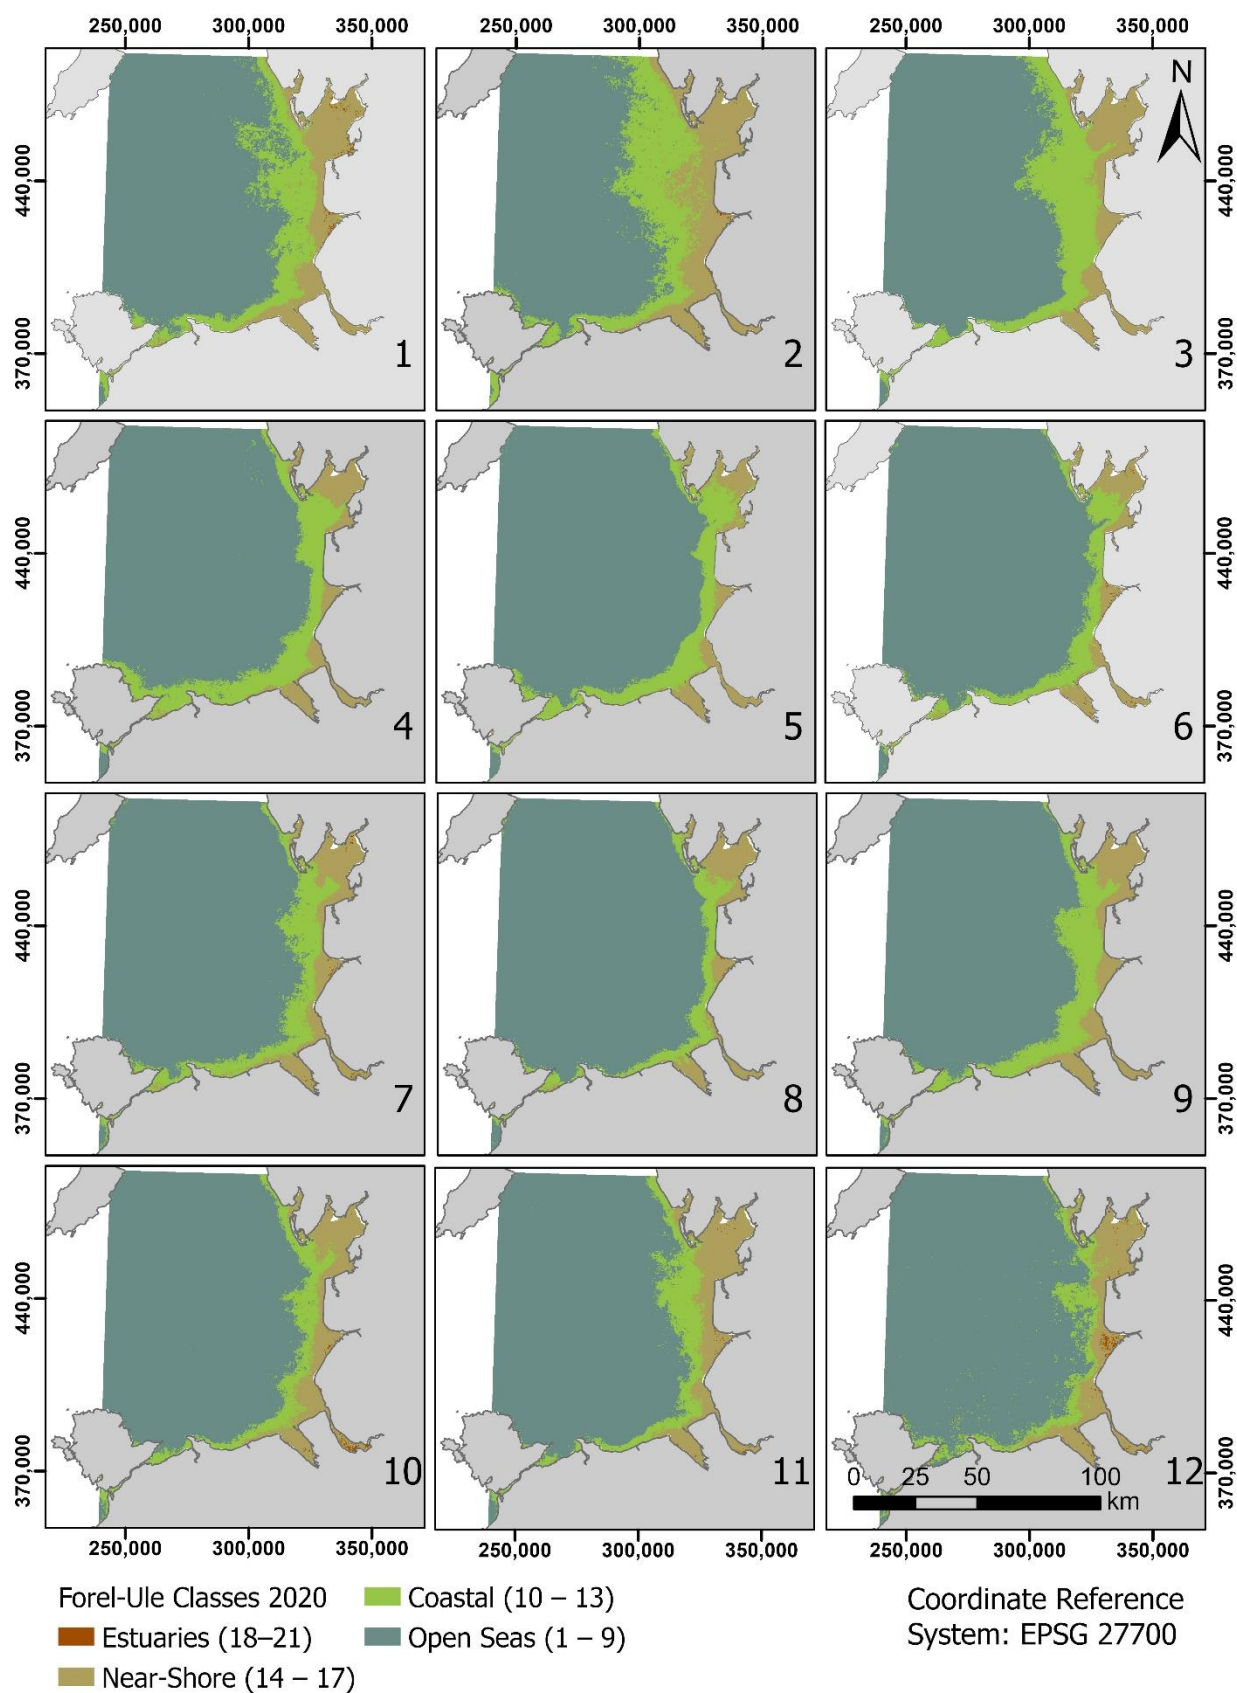

**Figure S3.** Spatial changes observed in the river plume extent (FUI  $\geq 10$ ) in 2017 does not show the presence of the three seasons: wet, dry and mixed. The river plume across all months in 2017 is relatively constant.

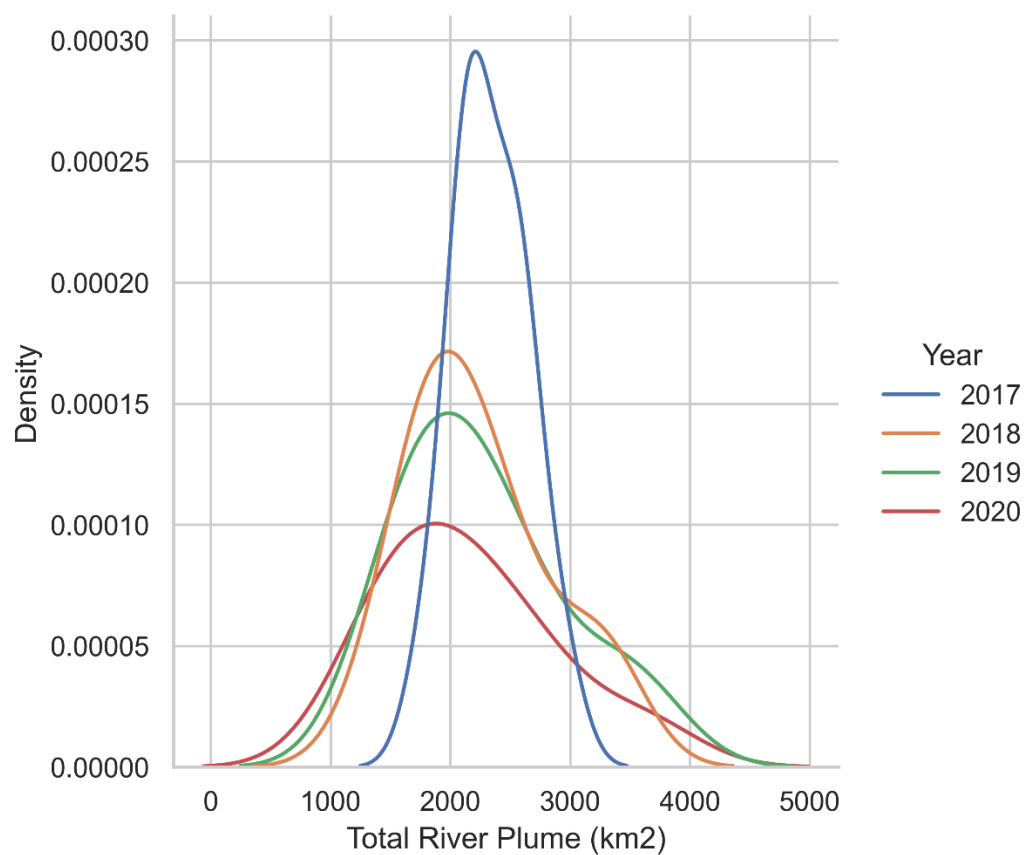

**Figure S4.** Kernel density distribution of the river plume data between 2017–2020.

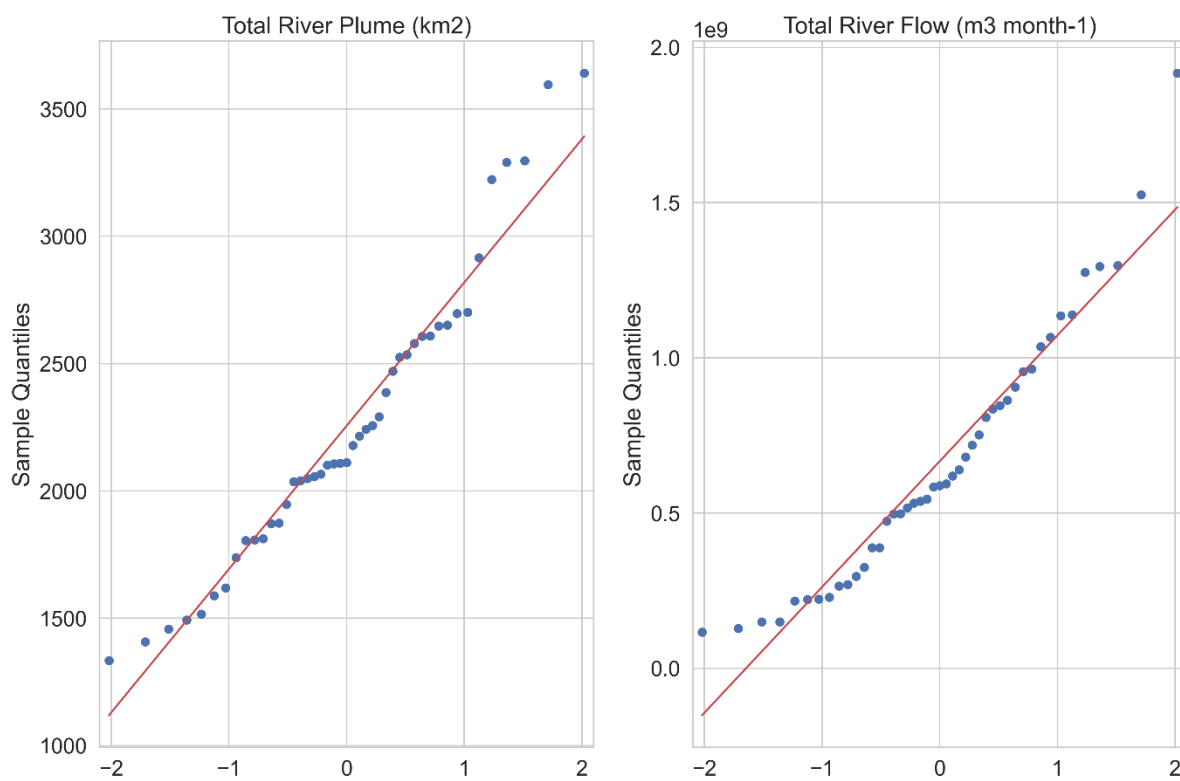

**Figure S5.** Q-Q plots showing a non-normal distribution of river plume and river flow data.



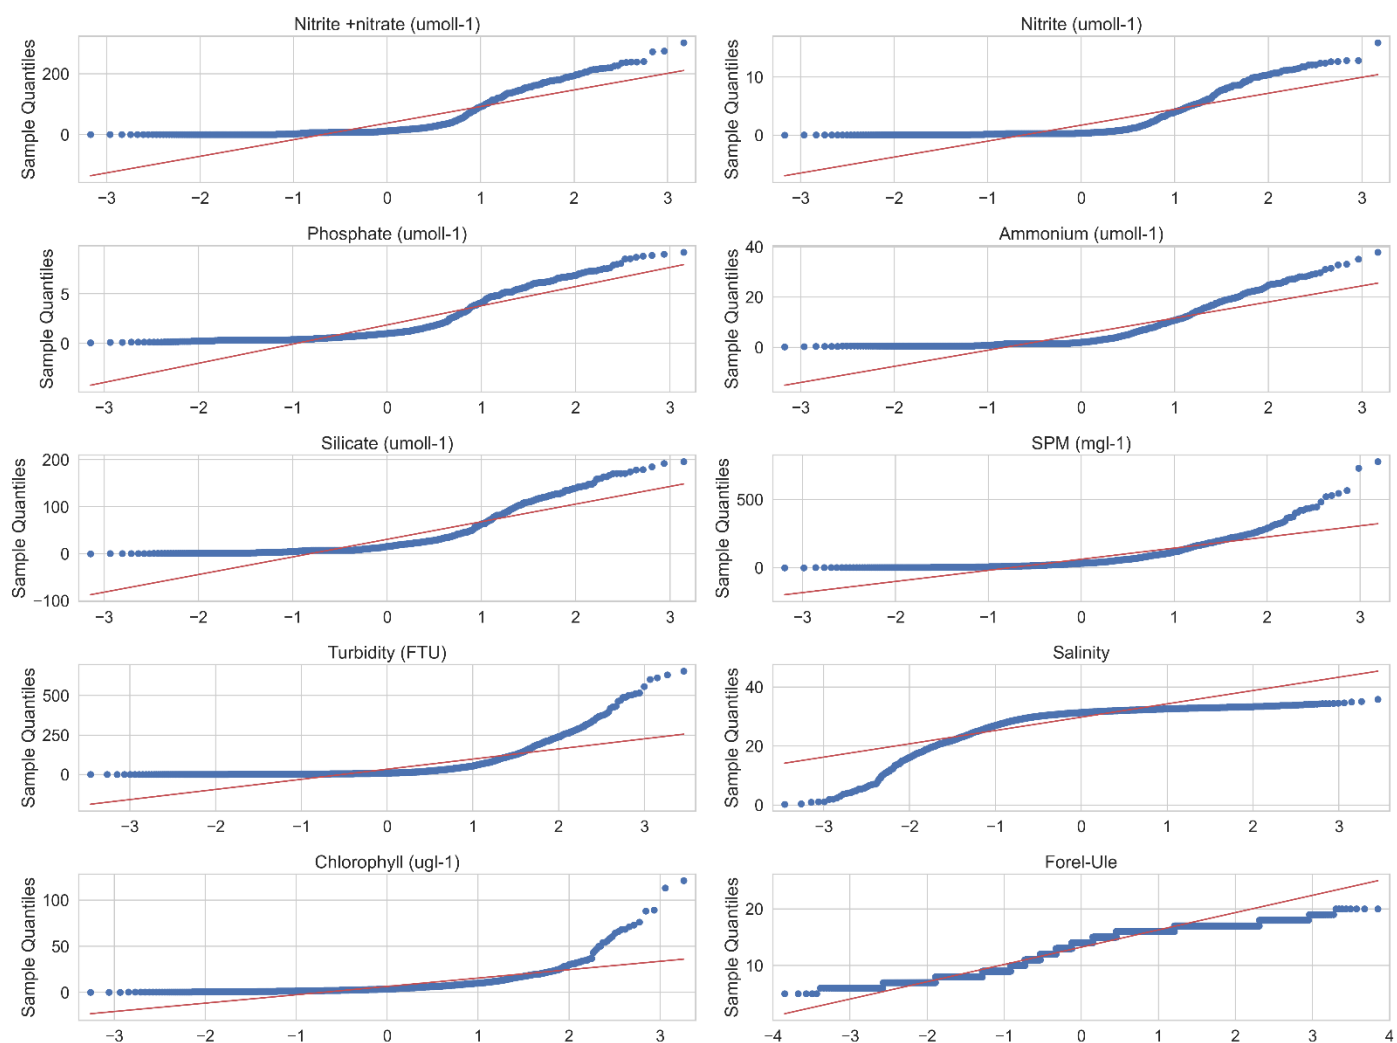

**Figure S6.** Q-Q plots for all the in-situ collected data and FUI show non-normal distribution.
